# Supplementary material for: Potential changes in the distribution of Carnegiea gigantea under future scenarios
Source: PeerJ. 2018 Sep 19;6:e5623. doi: 10.7717/peerj.5623 (PMC6151114; doi:10.7717/peerj.5623)
Supplement: Table S1 [file peerj-06-5623-s002.docx]

| **Main factors** | **Code** | **Description** | **Source** |
| --- | --- | --- | --- |
| **Climate** | Bio1 | Annual Mean Temperature | Hijmans et al. 2005 |
| Bio2 | Mean Diurnal Range (Mean of monthly (max temp - min temp)) |
| Bio3 | Isothermality (BIO2/BIO7) (* 100) |
| Bio4 | Temperature Seasonality (standard deviation *100) |
| Bio5 | Max Temperature of Warmest Month |
| Bio6 | Min Temperature of Coldest Month |
| Bio7 | Temperature Annual Range (BIO5-BIO6) |
| Bio8 | Mean Temperature of Wettest Quarter |
| Bio9 | Mean Temperature of Driest Quarter |
| Bio10 | Mean Temperature of Warmest Quarter |
| Bio11 | Mean Temperature of Coldest Quarter |
| Bio12 | Annual Precipitation |
| Bio13 | Precipitation of Wettest Month |
| Bio14 | Precipitation of Driest Month |
| Bio15 | Precipitation Seasonality (Coefficient of Variation) |
| Bio16 | Precipitation of Wettest Quarter |
| Bio17 | Precipitation of Driest Quarter |
| Bio18 | Precipitation of Warmest Quarter |
| Bio19 | Precipitation of Coldest Quarter |
| **Topography** | Elevation | Range in elevation | ISRIC, 2013; Hengl et al., 2014; WorldGrids (2018) |
| Slope | Slope |
| Topw | topographic wetness index |
| Topi | topographic openness index |
| Rad_mean | Mean potential incoming radiation |
| Rad_sd | Potential incoming radiation - Standard deviation |
